# Supplementary material for: Improving the electrocatalytic oxygen evolution byin situconstructing 1D Co9S8/Co(OH)F heterointerfaces
Source: Royal Society of Chemistry journal article supplement (doi:10.1039/d2nj04854j), 2022-01-01
Supplement: d2nj04854j1.pdf [file d2nj04854j1.pdf]

## Supplementary Materials

### Improving the electrocatalytic oxygen evolution by in situ constructing 1D $\text{Co}_9\text{S}_8/\text{Co}(\text{OH})\text{F}$ heterointerfaces

Xiaoting Zhao, Meng Li, Jun Liang\*, Li Li\*

College of Chemistry and Chemical Engineering, State Key Laboratory of High-efficiency Utilization of  
Coal and Green Chemical Engineering, Ningxia University, Yinchuan, Ningxia, 750021, China

E-mail: li\_l@nxu.edu.cn and junliang@nxu.edu.cn

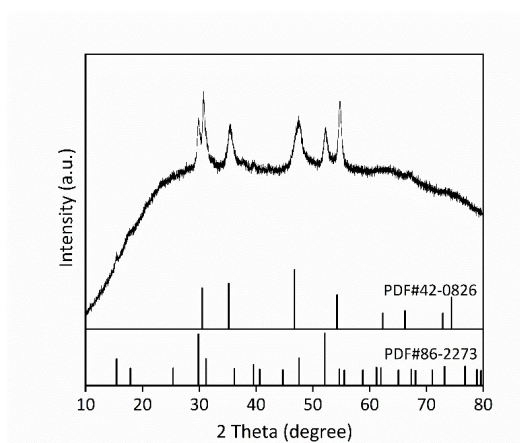

Figure S1. XRD pattern of the obtained  $\text{Co}_9\text{S}_8/\text{Co}_{1-x}\text{S}$ .

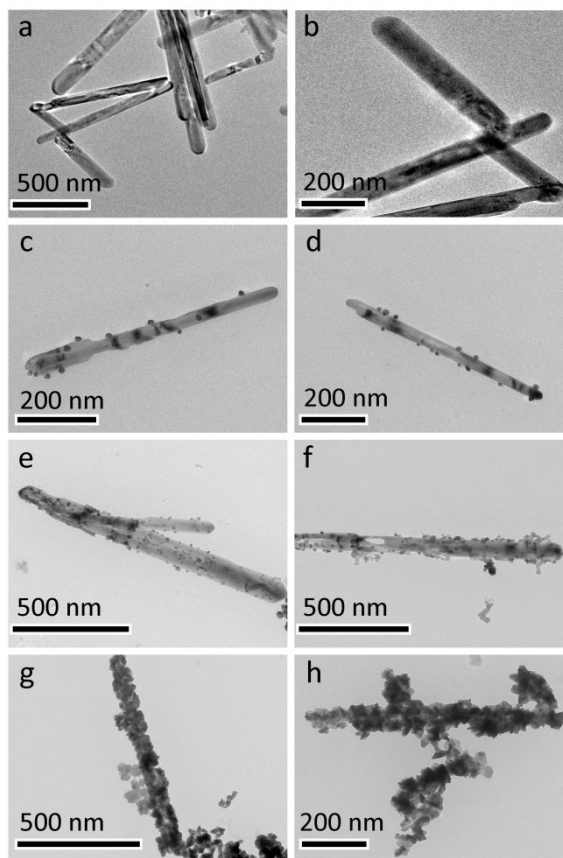

Figure S2. Typical TEM images of Co(OH)F (a, b), Co<sub>9</sub>S<sub>8</sub>/Co(OH)F-1 (c, d), Co<sub>9</sub>S<sub>8</sub>/Co(OH)F-2 (e, f), and Co<sub>9</sub>S<sub>8</sub>/Co<sub>1-x</sub>S (g, h).

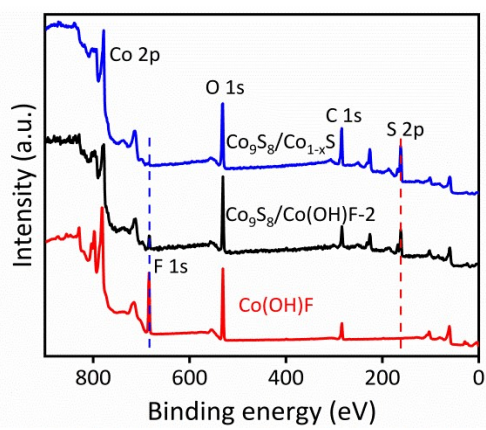

Figure S3. XPS survey pattern of  $\text{Co(OH)F}$ ,  $\text{Co}_9\text{S}_8/\text{Co(OH)F-2}$ , and  $\text{Co}_9\text{S}_8/\text{Co}_{1-x}\text{S}$ .

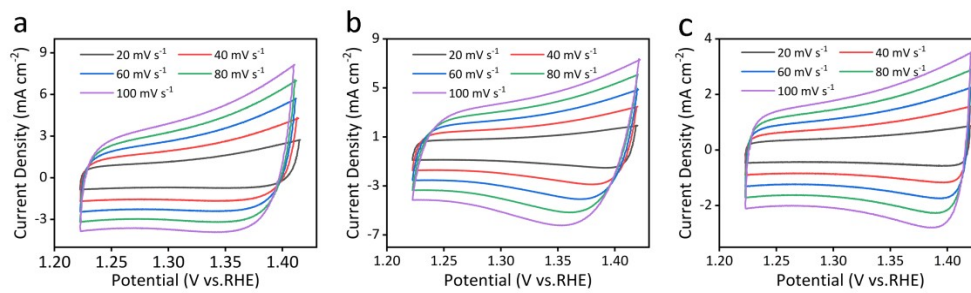

Figure S4. CV curves of  $\text{Co}_9\text{S}_8/\text{Co(OH)F-2}$  (a),  $\text{Co}_9\text{S}_8/\text{Co(OH)F-1}$  (b), and  $\text{Co(OH)F}$  (c) performed at different scan rates.
